# Supplementary material for: A case of behavioural diversification in male floral function – the evolution of thigmonastic pollen presentation
Source: Springer Nature journal article supplement (doi:10.1038/s41598-018-32384-4), 2018-09-13
Supplement: 41598_2018_32384_MOESM2_ESM.pdf [file 41598_2018_32384_MOESM2_ESM.pdf]

A case of behavioral diversification in male floral  
function – the evolution of thigmonastic pollen  
presentation

Supplementary Table 1  
Plant material

Tilo Henning, Moritz Mittelbach, Sascha A. Ismail, Rafael H. Acuña-Castillo, Maximilian Weigend

| Taxon                                                   | Voucher: Floral data          | Lab Code | Voucher: Molecular data       | GenBank codes |          |           |          |
|---------------------------------------------------------|-------------------------------|----------|-------------------------------|---------------|----------|-----------|----------|
|                                                         |                               |          |                               | trnL-trnF     | matK     | trnS-trnG | rps16    |
| <i>Aosa parviflora</i>                                  | Grant 4650 (BSB)              | W4000    | Grant 4650 (BSB)              | KY286967      | KY286698 | KY286877  | KY286787 |
| <i>Aosa rupestris</i>                                   | Weigend 7138 (BSB)            | W1289    | Weigend 7138 (BSB)            | KY286925      | KY286657 | KY286835  | KY286745 |
| <i>Blumenbachia hieronymi</i>                           | Ackermann 601 (BSB)           | W2846    | Ackermann 601 (BSB)           | KY286966      | KY286697 | KY286876  | KY286786 |
| <i>Blumenbachia insignis</i>                            | Weigend 7475 (B)              | W1622    | Weigend 7475 (B)              | KY286964      | KY286695 | KY286874  | KY286784 |
| <i>Blumenbachia latifolia</i>                           | Weigend 9135 (B)              | W1383    | Schwabe s.n. (1958) (B)       | KY286949      | KY286680 | KY286859  | KY286769 |
| <i>Caiophora andina</i>                                 | Schlumpberger 663 (LPB)       | W4520    | Moreira & Luebert 2379 (SGO)  | KY287005      | KY286735 | KY286915  | KY286825 |
| <i>Caiophora arechavalatae</i>                          | Weigend 9330 (BONN)           | W4003    | Weigend 9330 (BONN)           | KY286970      | KY286701 | KY286880  | KY286790 |
| <i>Caiophora canarinoides</i>                           | Ackermann 395 (BSB)           | W4011    | Ackermann 375 (BSB)           | KY286975      | KY286706 | KY286885  | KY286795 |
| <i>Caiophora carduifolia</i>                            | Ackermann & Kollehn 288 (BSB) | W1343    | Ackermann & Kollehn 288 (BSB) | KY286939      | KY286671 | KY286849  | KY286759 |
| <i>Caiophora cernua</i>                                 | Ackermann 1100 (BONN)         | W4007    | Ackermann 1100 (BONN)         | KY286972      | KY286703 | KY286882  | KY286792 |
| <i>Caiophora chuquitensis</i>                           | Ackermann 1101 (BONN)         | W4022    | Ackermann 1101 (BONN)         | KY286983      | KY286714 | KY286893  | KY286803 |
| <i>Caiophora cirsiifolia</i>                            | Weigend 7697 (B)              | W4024    | Ackermann 610 (BSB)           | KY286984      | KY286715 | KY286894  | KY286804 |
| <i>Caiophora clavata</i>                                | Ackermann 1102 (BONN)         | W4516    | Ackermann 1102 (BONN)         | KY287002      | KY286732 | KY286912  | KY286822 |
| <i>Caiophora coronata</i>                               | Weigend 9152 (BSB)            | W4009    | Coccuci & Sersic 4845 (CORD)  | KY286973      | KY286704 | KY286883  | KY286793 |
| <i>Caiophora hibiscifolia</i>                           | Ackermann 1103 (BONN)         | W4030    | Ackermann 1103 (BONN)         | KY286988      | KY286719 | KY286898  | KY286808 |
| <i>Caiophora lateritia</i>                              | Ackermann 1104 (BONN)         | W4031    | Ackermann 1104 (BONN)         | KY286989      | KY286720 | KY286899  | KY286809 |
| <i>Caiophora stenocarpa</i>                             | Ackermann et al. 758 (BSB)    | W4015    | Ackermann et al. 758 (BSB)    | KY286978      | KY286709 | KY286888  | KY286798 |
| <i>Grausa gayana</i>                                    | Weigend 7057 (MSB)            | W1609    | Weigend 7057 (MSB)            | KY286962      | KY286693 | KY286872  | KY286782 |
| <i>Huidobria fruticosa</i>                              | Kern 6 (B)                    | W1327    | Dillon 8034 (F)               | KY286932      | KY286664 | KY286842  | KY286752 |
| <i>Loasa acerifolia</i>                                 | Weigend 9142 (B)              | W1340    | Weigend et al. 6848 (BSB)     | KY286937      | KY286669 | KY286847  | KY286757 |
| <i>Loasa insons</i>                                     | Weigend 8724 (B)              | W1360    | Ackermann 536 (BSB)           | KY286943      | KY286674 | KY286853  | KY286763 |
| <i>Loasa nitida</i>                                     | Weigend et al. 7346 (BSB)     | W1339    | Weigend et al. 7346 (BSB)     | KY286936      | KY286668 | KY286846  | KY286756 |
| <i>Loasa sclaireifolia</i>                              | Weigend 8183 (B)              | W4132    | Weigend 8183 (B)              | KY286994      | KY286724 | KY286904  | KY286814 |
| <i>Loasa tricolor</i>                                   | Weigend 9010 (B)              | W4016    | Luebert 3021 (B)              | KY286979      | KY286710 | KY286889  | KY286799 |
| <i>Loasa triloba</i>                                    | Weigend 9008 (B)              | W4511    | Luebert & Bidart 3014b (B)    | KY286999      | KY286729 | KY286909  | KY286819 |
| <i>Nasa chenopodiifolia</i>                             | Weigend 8433 (B)              | W1415    | Weigend et al. 7685 (M)       | MF972162      | MF972134 | MF972176  | MF972148 |
| <i>Nasa dillonii</i>                                    | Weigend 7556 (B)              | W1413    | Weigend 7556 (B)              | MF972160      | MF972132 | MF972174  | MF972146 |
| <i>Nasa dyeri</i> subsp. <i>australis</i>               | Dostert 98/80 (MSB)           | W1624    | Dostert 98/80 (MSB)           | MF972165      | MF972137 | MF972179  | MF972151 |
| <i>Nasa macrothyrsa</i>                                 | Weigend 7471 (BSB)            | W1329    | Weigend et al. 97/s.n. (M)    | KY286934      | KY286666 | KY286844  | KY286754 |
| <i>Nasa moroensis</i>                                   | Weigend 7694 (B)              | W1414    | Weigend 7694 (B)              | MF972161      | MF972133 | MF972175  | MF972147 |
| <i>Nasa moroensis</i>                                   | Weigend 8424 (B)              | W2252    | Weigend 8424 (B)              | MF972167      | MF972139 | MF972181  | MF972153 |
| <i>Nasa olmosiana</i>                                   | Dostert 98/163 (MSB)          | W1567    | Dostert 98/163 (MSB)          | MF972163      | MF972135 | MF972177  | MF972149 |
| <i>Nasa olmosiana</i>                                   | Weigend 8541 (BSB)            | W4525    | Weigend 8541 (BSB)            | MF972171      | MF972143 | MF972185  | MF972157 |
| <i>Nasa poissoniana</i> subsp. <i>glandulifera</i>      | Weigend & Schwarzer 8009 (B)  | W4527    | Weigend & Schwarzer 8009 (B)  | MF972172      | MF972144 | MF972186  | MF972158 |
| <i>Nasa poissoniana</i> subsp. <i>poissoniana</i>       | Ackermann 756 (BSB)           | W1243    | M. & K. Weigend 00/208 (NY)   | KY286918      | KY286650 | KY286828  | KY286738 |
| <i>Nasa ranunculifolia</i> subsp. <i>ranunculifolia</i> | Henning 06/05 (B)             | W2262    | Henning 06/05 (B)             | MF972169      | MF972141 | MF972183  | MF972155 |
| <i>Nasa triphylla</i> subsp. <i>flavipes</i>            | Weigend & Dostert 98/203 (M)  | W1623    | Weigend & Dostert 98/203 (M)  | MF972164      | MF972136 | MF972178  | MF972150 |
| <i>Nasa triphylla</i> subsp. <i>triphylloides</i>       | Ackermann 602 (BSB)           | W2243    | Ackermann 602 (BSB)           | MF972166      | MF972138 | MF972180  | MF972152 |
| <i>Nasa triphylla</i> subsp. <i>triphylloides</i>       | Weigend & Brokamp 9098 (B)    | W2680    | Weigend & Brokamp 9098 (B)    | MF972170      | MF972142 | MF972184  | MF972156 |
| <i>Nasa vargasii</i>                                    | Weigend 5463 (B)              | W2261    | Weigend 5463 (B)              | MF972168      | MF972140 | MF972182  | MF972154 |
| <i>Nasa weigendii</i>                                   | Weigend 7913 (USM)            | W4528    | Weigend 7913 (USM)            | MF972173      | MF972145 | MF972187  | MF972159 |
| <i>Plakothira parviflora</i>                            | Weigend s.n. (BSB)            | W1290    | Weigend s.n. (BSB)            | KY286926      | KY286658 | KY286836  | KY286746 |
| <i>Presliophytum heucheraefolium</i>                    | Weigend 7691 (BONN)           | W1369    | Weigend 7368 (BSB)            | KY286946      | KY286677 | KY286856  | KY286766 |
| <i>Presliophytum incanum</i>                            | Weigend & Dostert 97/12 (M)   | W1288    | Weigend & Förther 97/848 (F)  | KY286924      | KY286656 | KY286834  | KY286744 |
| <i>Scyphanthus elegans</i>                              | Weigend 9032 (BSB)            | W1467    | Grau & Erhart 2-093 (M)       | KY286958      | KY286689 | KY286868  | KY286778 |
| <i>Scyphanthus stenocarpus</i>                          | Gardner & Knees 8351 (BSB)    | W4035    | Gardner & Knees 8351 C (BSB)  | KY286992      | KY286723 | KY286902  | KY286812 |
| <i>Xylopodia klaprothioides</i>                         | Weigend et al. 97/450 (M)     | W1287    | Weigend et al. 97/450 (M)     | KY286923      | KY286655 | KY286833  | KY286743 |
| OUTGROUPS                                               |                               |          |                               |               |          |           |          |
| <i>Deutzia discolor</i>                                 |                               | W1293    | Weigend 5615 (BSB)            | KY286929      | KY286661 | KY286839  | KY286749 |
| <i>Eucnide urens</i>                                    |                               | W4499    | Weigend 9153 (BSB)            | KY286996      | KY286726 | KY286906  | KY286816 |
| <i>Gronovia scandens</i>                                |                               | W4500    | Weigend et al. 8522 (BSB)     | KY286997      | KY286727 | KY286907  | KY286817 |
| <i>Mentzelia albescens</i>                              |                               | W1285    | Weigend et al. 6865 (BSB)     | KY286921      | KY286653 | KY286831  | KY286741 |
