# Supplementary material for: A case of behavioural diversification in male floral function – the evolution of thigmonastic pollen presentation
Source: Springer Nature journal article supplement (doi:10.1038/s41598-018-32384-4), 2018-09-13
Supplement: 41598_2018_32384_MOESM3_ESM.pdf [file 41598_2018_32384_MOESM3_ESM.pdf]

# A case of behavioral diversification in male floral function – the evolution of thigmonastic pollen presentation

Supplementary Table 2  
Pollinator data

*Tilo Henning, Moritz Mittelbach, Sascha A. Ismail, Rafael H. Acuña-Castillo, Maximilian Weigend*

| Taxon                                                      | Voucher plant            | Literature | Pollination syndrome | Visitor taxon                            | Visitor family                          | Voucher visitor     |
|------------------------------------------------------------|--------------------------|------------|----------------------|------------------------------------------|-----------------------------------------|---------------------|
| <i>Aosa rupestris</i> Gardn.                               |                          | 1, 10      |                      | Gen. Spec.                               | Colletidae                              |                     |
|                                                            |                          | 15, 25     |                      | <i>Bicolletes nordestina</i> Urban, 2006 | Paracolletini – Colletinae – Colletidae |                     |
| <i>Blumenbachia insignis</i> Schrad.                       |                          | 1, 5       |                      | Gen. Spec.                               | Colletidae                              |                     |
|                                                            |                          | 6          |                      | Gen. Spec.                               | Halictidae                              |                     |
|                                                            |                          | 1          |                      | Gen. Spec.                               | Megachilidae                            |                     |
|                                                            |                          | 15, 22     |                      | <i>Bicolletes pampeana</i>               | Paracolletini – Colletinae – Colletidae |                     |
|                                                            |                          | 15, 22     |                      | <i>Colletes furfurascens</i>             | Colletini - Colletinae– Colletidae      |                     |
|                                                            |                          | 15, 22     |                      | <i>Colletes cyaneus</i>                  | Colletini – Colletinae – Colletidae     |                     |
|                                                            |                          | 15, 22     |                      | <i>Dialictus opacus</i>                  | Halictini – Halictinae -Halictidae      |                     |
|                                                            |                          | 15, 22     |                      | <i>Mielkeanthidium rubripes</i>          | Anthidini – Anthidinae – Megachilidae?  |                     |
| <i>Blumenbachia latifolia</i> St.Hil.                      |                          | 15, 16     |                      | Gen. Spec.                               | Colletidae                              |                     |
|                                                            |                          | 15         |                      | <i>Leioproctus fulvoniger</i>            | Colletidae - ? - ?                      |                     |
| <i>Caiophora arechavaletae</i> (Urb.)<br>Urb. & Gilg       |                          | 15         |                      | <i>Bicolletes pampeana</i>               | Paracolletini – Colletinae – Colletidae |                     |
|                                                            |                          | 15         |                      | <i>Bicolletes franki</i>                 | Paracolletini - Colletinae– Colletidae  |                     |
|                                                            |                          | 15         |                      | <i>Chilicola spec.</i>                   | Paracolletini – Colletinae - Colletidae |                     |
| <i>Caiophora canarinoides</i> (Lenné & K.Koch) Urb. & Gilg |                          | 1          |                      | Hummingbird                              |                                         |                     |
| <i>Caiophora carduifolia</i> C.Presl.                      |                          | 1          |                      | Hummingbird                              |                                         |                     |
| <i>Caiophora cernua</i> (Griseb ) Urb. & Gilg ex Kurtz     |                          | 26         |                      | Gen. Spec.                               | Colletidae                              |                     |
|                                                            |                          | 4          |                      | Gen. Spec.                               | Apidae                                  |                     |
| <i>Caiophora chuquitensis</i> (Meyen) Urb. & Gilg          |                          | 26         |                      | Gen. Spec.                               | "Bee"                                   |                     |
|                                                            |                          | 26         |                      | Hummingbird                              |                                         |                     |
|                                                            |                          | 4, 7, 26   |                      | Hummingbird                              |                                         |                     |
|                                                            |                          | 7          |                      | Gen. Spec.                               | Apidae                                  |                     |
|                                                            |                          | 7, 15, 26  |                      | <i>Bombus spec.</i>                      | Apidae                                  |                     |
|                                                            |                          | 7, 15      |                      | <i>Chilicola spec.</i>                   | Colletidae                              |                     |
|                                                            |                          | 7, 15      |                      | Gen. Spec.                               | Colletidae                              |                     |
|                                                            | M. & K. Weigend 2000/203 |            |                      |                                          | Hummingbird                             | Aves                |
| <i>Caiophora cirsiifolia</i> K.Presl                       | Henning & Schulz 22      |            |                      | <i>Lonchoryncha spec.</i>                | Paracolletini - Colletidae              | Henning & Schulz 33 |
|                                                            |                          |            |                      | <i>Centris spec.</i>                     | Centridinii                             | Henning & Schulz 29 |
|                                                            |                          |            |                      | <i>Centris spec.</i>                     | Centridinii                             | Henning & Schulz 31 |

|                                                     |                     |            |                             |                                        |                     |
|-----------------------------------------------------|---------------------|------------|-----------------------------|----------------------------------------|---------------------|
|                                                     |                     |            | Gen. Spec.                  | ?                                      | Henning & Schulz 32 |
|                                                     |                     |            | Gen. Spec.                  | Megachilidae                           | Henning & Schulz 30 |
|                                                     | Weigend et al. 7754 |            | <i>Centris spec.</i>        | Centridini - Apinae – Apidae           |                     |
|                                                     |                     |            | <i>Centris spec.</i>        | Centridini - Apinae – Apidae           |                     |
|                                                     |                     | 1          | Bombus                      | Apidae                                 |                     |
|                                                     |                     | 1, 20, 23  | <i>Centris spec.</i>        | Apidae                                 |                     |
|                                                     | Weigend et al. 2003 |            | <i>Centris spec.</i>        | Centridini - Apinae – Apidae           |                     |
| <i>Caiophora clavata</i> Urb. & Gilg                |                     | 4          | Fam. Gen. Spec.             | "Bee"                                  |                     |
|                                                     |                     | 7          | <i>Bombus spec.</i>         | Apidae                                 |                     |
|                                                     |                     | 7, 15      | <i>Chilicola</i>            | Colletidae                             |                     |
|                                                     |                     | 7, 15, 26  | Gen. Spec.                  | Colletidae                             |                     |
|                                                     |                     | 15         | <i>Chilicola spec.</i>      | Paracolletini - Colletidae – Colletina |                     |
|                                                     |                     | 15         | <i>Colletes mastochila</i>  | Colletini - Colletinae– Colletidae     |                     |
| <i>Caiophora coronata</i> (Arn.) Hook & Arn.        |                     | 1, 4, 26   | Small rodent                | Mammalia                               |                     |
|                                                     |                     | 1, 2, 4, 7 | Hummingbird                 |                                        |                     |
|                                                     |                     | 1, 4       | Passerines                  |                                        |                     |
|                                                     |                     | 1          | Gen. Spec.                  | "Bee"                                  |                     |
|                                                     |                     | 2, 12      | <i>Bombus spec.</i>         | Apidae                                 |                     |
|                                                     |                     | 2, 4       | Gen. Spec.                  | Megachilidae                           |                     |
| <i>Caiophora hibiscifolia</i> (Griseb.) Urb. & Gilg |                     | 26         | Hummingbird                 |                                        |                     |
|                                                     |                     | 7          | <i>Bombus spec.</i>         | Apidae                                 |                     |
|                                                     |                     | 7          | Eucerini                    | Apidae                                 |                     |
|                                                     |                     | 8          | Hummingbird                 | Aves                                   |                     |
| <i>Caiophora lateritia</i> (Hook.) Benth.           |                     | 1, 4, 26   | Hummingbird                 |                                        |                     |
|                                                     |                     | 14         | Gen. Spec.                  | "Bee"                                  |                     |
|                                                     |                     | 26         | Gen. Spec.                  | Apidae                                 |                     |
|                                                     |                     | 26         | <i>Bombus spec.</i>         | Apidae                                 |                     |
|                                                     |                     | 26         | <i>Xylocopa spec.</i>       | Apidae                                 |                     |
|                                                     |                     | 26         | Gen. Spec.                  | Halictidae                             |                     |
| <i>Loasa acerifolia</i> Domb.                       |                     | 26         | Gen. Spec.                  | "Bee"                                  |                     |
| <i>Loasa acerifolia</i> Domb.                       | Weigend et al. 5848 |            | <i>Bombus cf. dahlbomii</i> | Bombini – Apinae? – Apidae             |                     |
|                                                     | Weigend et al. 6055 |            | <i>Apis mellifera</i>       | Apini – Apinae - Apidae                |                     |
|                                                     |                     |            | <i>Bombus cf. dahlbomii</i> | Bombini – Apinae? – Apidae             |                     |
| <i>Loasa insons</i> Poepp.                          | Weigend et al. 5913 |            | <i>Apis mellifera</i>       | Apini – Apinae - Apidae                |                     |

|                                                                                         |                            |                                     |  |                                                              |                                                              |                                   |  |
|-----------------------------------------------------------------------------------------|----------------------------|-------------------------------------|--|--------------------------------------------------------------|--------------------------------------------------------------|-----------------------------------|--|
|                                                                                         |                            |                                     |  | Gen. Spec.                                                   | Colletidae (1)                                               |                                   |  |
|                                                                                         |                            |                                     |  | Gen. Spec.                                                   | Colletidae (2)                                               |                                   |  |
|                                                                                         |                            |                                     |  | Gen. Spec.                                                   | Colletidae (3)                                               |                                   |  |
|                                                                                         | Weigend et al.<br>5913b    |                                     |  | <i>Xylocopa spec.</i>                                        | Xylocopini – Xylocopinae - Apidae                            |                                   |  |
|                                                                                         |                            |                                     |  | <i>Apis mellifera</i>                                        | Apini – Apinae - Apidae                                      |                                   |  |
|                                                                                         |                            |                                     |  | Gen. Spec.                                                   | Colletidae (2)                                               |                                   |  |
|                                                                                         |                            |                                     |  | Gen. Spec.                                                   | Colletidae (1)                                               |                                   |  |
|                                                                                         |                            |                                     |  | <i>Tygathe spec.</i>                                         | Apidae (ehem.- Anthophoridae)                                |                                   |  |
| <i>Loasa nitida</i> Desr.                                                               | Weigend 2000/660           |                                     |  | Gen. Spec.                                                   | Megachilidae                                                 |                                   |  |
|                                                                                         | Weigend et al.<br>2000/660 |                                     |  | Gen. Spec.                                                   | Halictidae                                                   |                                   |  |
| <i>Loasa tricolor</i> Ker Gawl.                                                         |                            | 3                                   |  | Gen. Spec.                                                   | Apidae                                                       |                                   |  |
|                                                                                         |                            | 3, 11, 12, 18, 20                   |  | Eucerini                                                     | Apidae                                                       |                                   |  |
|                                                                                         |                            | 19                                  |  | <i>Chilicola spec.</i>                                       | Colletidae                                                   |                                   |  |
|                                                                                         |                            | 3, 9, 10, 11, 12, 13,<br>18, 19, 24 |  | Gen. Spec.                                                   | Colletidae                                                   |                                   |  |
|                                                                                         |                            | 3, 11, 12                           |  | Gen. Spec.                                                   | Megachilidae                                                 |                                   |  |
|                                                                                         |                            | 3, 11                               |  | Gen. Spec.                                                   | Halictidae                                                   |                                   |  |
|                                                                                         |                            | 18                                  |  |                                                              | Diptera                                                      |                                   |  |
| <i>Nasa ranunculifolia</i> (Kunth)<br>Weigend                                           | Weigend et al.<br>97/367   |                                     |  | <i>Bombus cf. robustus</i>                                   | Bombini – Apinae? – Apidae                                   | 97/Z1                             |  |
| <i>Nasa ranunculifolia</i><br>( <i>cymbopetala</i> )                                    |                            | 21                                  |  | Hummingbird                                                  |                                                              |                                   |  |
| <i>Nasa dyeri</i> (Urb. & Gilg)<br>Weigend subsp. <i>australis</i><br>Dostert & Weigend | Dostert 98/80              |                                     |  | <i>Apis mellifera</i>                                        | Apinini – Apinae - Apidae                                    | N. Dostert 1998/G.                |  |
|                                                                                         |                            |                                     |  | <i>Trigona guianensis</i>                                    | ? - Apidae                                                   | N. Dostert 1998/G.                |  |
|                                                                                         |                            |                                     |  | <i>Partamona spec.</i>                                       | Meliponini - ? - Apidae                                      | N. Dostert 1998/G.                |  |
| <i>Nasa macrothyrsa</i> (Urb. & Gilg)<br>Weigend                                        | Henning & Schulz<br>32     |                                     |  | <i>Neoxylocopa</i>                                           | Xylocopini - Xylocopinae - Apidae                            | Henning & Schulz 39               |  |
|                                                                                         |                            |                                     |  | <i>Apis mellifera</i>                                        | - Apidae                                                     | Henning & Schulz 40               |  |
|                                                                                         |                            |                                     |  | <i>Neoxylocopa spec.</i>                                     | Xylocopini - Xylocopinae - Apidae                            | Henning & Schulz 41               |  |
|                                                                                         |                            |                                     |  | <i>Apis mellifera</i>                                        | - Apidae                                                     | Henning & Schulz 42               |  |
|                                                                                         | Weigend et al.<br>97/428   |                                     |  |                                                              | <i>Xylocopa viridigaster</i><br>Lepelletier 1843             | Xylocopini - Xylocopinae - Apidae |  |
|                                                                                         |                            |                                     |  |                                                              | <i>Xylocopa lachnea</i><br>( <i>Neoxylocopa</i> ) Moure 1951 | Xylocopini - Xylocopinae - Apidae |  |
|                                                                                         | Henning &<br>Schneider 118 |                                     |  |                                                              | Gen. Spec.                                                   | Colletidae                        |  |
|                                                                                         |                            |                                     |  | <i>Xylocopa lachnea</i><br>( <i>Neoxylocopa</i> ) Moure 1951 | Xylocopini - Xylocopinae - Apidae                            |                                   |  |

|                                                       |                                    |       |   |                       |                                             |                                           |       |
|-------------------------------------------------------|------------------------------------|-------|---|-----------------------|---------------------------------------------|-------------------------------------------|-------|
| <i>Nasa moroensis</i> Weigend                         | Weigend et al. 7694                |       |   | Gen. Spec.            | Colletidae                                  |                                           |       |
| <i>Nasa olmosiana</i> (Gilg ex J.F. Macbr.) Weigend   | Henning & Schulz 41                |       |   | Gen. Spec.            | ?                                           | Henning & Schulz 55                       |       |
|                                                       |                                    |       |   | <i>Apis mellifera</i> | Apidae                                      | Henning & Schulz 56                       |       |
|                                                       |                                    |       |   | <i>Apis mellifera</i> | Apidae                                      | Henning & Schulz 57                       |       |
|                                                       |                                    |       |   | Gen. Spec.            | ?                                           | Henning & Schulz 58                       |       |
|                                                       |                                    |       |   | Gen. Spec.            | ?                                           | Henning & Schulz 59                       |       |
| <i>Nasa triphylla</i> (Juss.) Weigend                 |                                    | 1     |   | Gen. Spec.            | Colletidae                                  |                                           |       |
|                                                       |                                    | 21    |   | Gen. Spec.            | Megachilidae                                |                                           |       |
| <i>Nasa urens</i> (Jacq.) Weigend                     |                                    | 1, 17 |   | Gen. Spec.            | Colletidae                                  |                                           |       |
|                                                       |                                    | 21    |   | Gen. Spec.            | Megachilidae                                |                                           |       |
|                                                       | Observation M. Weigend, no voucher |       |   |                       | <i>Megachile spec.</i>                      | Megachilini – Megachilinae - Megachilidae |       |
|                                                       |                                    |       |   |                       | Gen. Spec.                                  | Colletidae                                |       |
|                                                       | Weigend & Skrabal 5889             |       |   |                       | Gen. Spec.                                  | Colletidae (1)                            |       |
|                                                       |                                    |       |   |                       | Gen. Spec.                                  | Colletidae (2)                            |       |
|                                                       |                                    |       |   |                       | <i>Megachile spec.</i>                      | Megachilini – Megachilinae - Megachilidae |       |
| <i>Nasa vargasii</i> (Killip) Weigend                 | Weigend & Weigend 2000/396         |       |   | Gen. Spec.            | Megachilini – Megachilinae - Megachilidae   | 2000/396./Z1b.<br>2000/396./Z1c           |       |
|                                                       |                                    |       |   | Caupolicana sp.       | Caupolicanini – Diphaglossinae - Colletidae | 2000/396./Z1b,<br>2000/396./Z1c           |       |
|                                                       | Weigend & Weigend 2000/s.n.        |       |   | Caupolicana sp.       | Caupolicanini – Diphaglossinae - Colletidae | 2000/s.n./Z1                              |       |
| <i>Presliophytum heucheraefolium</i> (Killip) Weigend |                                    | 1     |   | <i>Xylocopa spec.</i> | Apidae                                      |                                           |       |
|                                                       | Weigend et al. 5536                |       |   | <i>Xylocopa spec.</i> | Xylocopini – Xylocopinae - Apidae           |                                           |       |
|                                                       |                                    |       |   |                       | <i>Megachile spec.</i>                      | Megachilini – Megachilinae - Megachilidae |       |
| <i>Presliophytum incanum</i> (Urb. & Gilg) Weigend    | Observation M. Weigend, no voucher |       |   | <i>Xylocopa spec.</i> | Xylocopini – Xylocopinae - Apidae           |                                           |       |
|                                                       |                                    |       | 1 |                       | Gen. Spec.                                  | Colletidae                                |       |
|                                                       |                                    | 1     |   |                       |                                             | Lepidoptera                               |       |
|                                                       | Weigend et al. 97/198              |       |   |                       | <i>Megachile spec.</i>                      | Megachilini – Megachilinae - Megachilidae | 97/Z3 |
| <i>Scyphanthus elegans</i> D.Don.                     |                                    | 12    |   | <i>Centris spec.</i>  | Apidae                                      |                                           |       |
|                                                       |                                    | 2     |   | Eucerini              | Apidae                                      |                                           |       |
|                                                       |                                    | 2, 12 |   | Gen. Spec.            | Megachilidae                                |                                           |       |
| <i>Xylopodia klaprothioides</i>                       | Henning & Schulz                   |       |   | Gen. Spec.            | Colletidae - Colletini                      | Henning & Schulz 43                       |       |

|         |    |   |  |                          |                                   |                     |
|---------|----|---|--|--------------------------|-----------------------------------|---------------------|
| Weigend | 34 |   |  | Gen. Spec.               | Colletidae - Colletini            | Henning & Schulz 44 |
|         |    |   |  | Gen. Spec.               | Colletidae - Colletini            | Henning & Schulz 45 |
|         |    |   |  | Gen. Spec.               | Gen. Spec. Diptera                | Henning & Schulz 46 |
|         |    |   |  | <i>Neoxylocopa spec.</i> | Xylocopini - Xylocopinae - Apidae | Henning & Schulz 47 |
|         |    | 1 |  | Gen. Spec.               | Colletidae                        |                     |

Grey filling: data obtained from the literature, without filling: own observations in the field. Color code for pollination syndrome:

|                            |
|----------------------------|
| short-tongued bees         |
| long-tongued bees          |
| hummingbirds               |
| mammals                    |
| various (i.a. butterflies) |

#### Literature:

- Ackermann M, Weigend M (2006) Nectar, floral morphology and pollination syndrome in Loasaceae subfam. Loasoideae (Cornales). *Ann. Bot.* 98: 503-514
- Arroyo MTK, Primack R, Armesto J (1982) Community studies in pollination ecology in the high temperate Andes of central Chile 1. Pollination mechanisms and altitudinal variation. *Am. J. Bot.* 69: 82-97.
- Cares-Suarez R, Poch T, Acevedo RF, Acosta-Bravo I, Pimentel C, et al. (2011) Do pollinators respond in a dose-dependent manner to flower herbivory?: An experimental assessment in *Loasa tricolor* (Loasaceae). *Gayana Bot.* 68: 176-181.
- Cocucci AA, Sérsic AN (1998) Evidence of rodent pollination in *Cajophora coronata* (Loasaceae). *Pl. Syst. Evol.* 211: 113-128.
- Compagnucci LA, Roig Alsina A (2008) Nuevos *Leioproctus* Smith de la Argentina correspondientes a los subgéneros *Spinolapis* Moure y *Perditomorpha* Ashmead (Hymenoptera, Colletidae). *Revista del Museo Argentino de Ciencias Naturales Nueva Serie* 10: 319-327.
- Devoto M (2006) Interacciones planta - polinizador a lo largo de un gradiente ambiental: una aproximación en escala de comunidad. Magister thesis. Buenos Aires, Argentina: Universidad de Buenos Aires. 130 p.
- Harter B (1995) Blütenökologie einiger von Bienen und Kolibris bestäubter *Cajophora*-Arten (Loasaceae). Diploma thesis. Tübingen: University of Tübingen. 63 p.
- Harter B, Schindwein C, Wittmann D (1995) Bienen und Kolibris als Bestäuber von Blüten der Gattung *Cajophora* (Loasaceae). *Apidologie* 26: 356-357.
- Jaffuel F, Pirion A (1926) Himenópteros del valle de Marga-Marga. *Revista Chilena de Historia Natural* 30: 362-383.
- Martins CF (2002) Diversity of the Bee Fauna of the Brazilian Caatinga. In: Kevan P, Imperatriz Fonseca VL, editors. *Pollinating Bees - The Conservation Link Between Agriculture and Nature*. Brasilia: Ministry of Environment. pp. 131-134.
- Montalva J, Castro B, Allendes JL (2010) Las Abejas del Jardín Botánico Chagual, estudio de caso de abejas nativas en zonas urbanas, Santiago Chile. *Revista del Jardín Botánico Chagual* 8: 13-23.
- Montalva J, Vial P (2012) Abeja de Chile. (accessed 18.02.2014) <http://abejasdechile.blogspot.de>
- Packer L, Zayed A, Grixti JC, Ruz L, Owen RE, et al. (2005) Conservation genetics of potentially endangered mutualisms: Reduced levels of genetic variation in specialist versus generalist bees. *Conserv. Biol.* 19: 195-202.
- Sargent RD, Otto SP (2004) A phylogenetic analysis of pollination mode and the evolution of dichogamy in angiosperms. *Evol. Ecol. Res.* 6: 1183-1199.
- Schindwein C (2000) Verhaltensanpassungen oligolektischer Bienen an synchrone und an kontinuierliche Pollenpräsentation. In: Breckle SW, Schweizer B, Arndt U, editors. *Ergebnisse weltweiter ökologischer Forschung*. Stuttgart: Verlag Günter Heimbach. pp. 235-250.
- Silveira FA (2009) A synopsis of Actenosigynes Moure, Graf & Urban, 1999 (Hymenoptera: Colletidae) - new species, possible oligolecty and biogeographic comments. *Zootaxa*: 15-24.
- Stiles FG, Freeman CE (1993) Patterns in floral nectar characteristics of some bird-visited plant species from Costa Rica. *Biotropica* 25: 191-205.

18. Troncoso AJ, Vargas RR (2004) Efecto del vecindario floral sobre la tasa de visitas por insectos a *Loasa triloba* Domb. ex A.J. Juss. y *Loasa tricolor* Ker-Gawl En la Reserva Nacional de Río Clarillo, Región Metropolitana, Chile. *Chloris chilensis* 7: 1-8.
19. Urban D, Moure JS (2001) Catálogo de Apoidea da região. Neotropical (Hymenoptera, Colletidae). II. Diphaglossinae. *Rev. Bras. Zool.* 18: 1-34.
20. Vivallo F, Zanella FCV, Toro H (2003) Las especies chilenas de *Centris* (Paracentris) Cameron, 1903 y *Centris* (Penthemisia) Moure, 1950 (Hymenoptera: Apidae). In: Melo GAR, Alves-dos-Santos I, editors. *Apoidea neotropica: Homenagem aos 90 anos de Jesus Santiago Moure*. Santa Satarina: Editora Universidad do Extremo Sul Catarinense, Criciúma. pp. 77-83.
21. Weigend M, Gottschling M (2006) Evolution of funnel-revolver flowers and ornithophily in *Nasa* (Loasaceae). *Pl. Biol.* 8: 120-142.
22. Wittmann D, Schlindwein C (1995) Melittophilous plants, their pollen and flower visiting bees in Southern Brazil. 1. Loasaceae. *Biociências* 3: 19-34.
23. Zanella FCV (2002) Sistemática, filogenia e distribuição geográfica das espécies sul-americanas de *Centris* (Paracentris) Cameron, 1903 e de *Centris* (Penthemisia) Moure, 1950, incluindo uma análise filogenética do “grupo *Centris*” sensu Ayala, 1998 (Hymenoptera, Apoidea, Centridini). *Rev. Bras. Entomol* 46: 435-488.
24. Zayed A, Packer L, Gixti JC, Ruz L, Owen RE, et al. (2005) Increased genetic differentiation in a specialist versus a generalist bee: implications for conservation. *Conservation Genetics* 6: 1017-1026.
25. Leite AV, Nadia T, Machado IC (2016) Pollination of *Aosa rupestris* (Hook.) Weigend (Loasaceae): are stamen movements induced by pollinators? *Braz. J. Bot.* 39: 559–567.
26. Strelin MM, Benitez-Vieyra S, Fornoni J, Klingenberg CP, Cocucci AA (2016) Exploring the ontogenetic scaling hypothesis during the diversification of pollination syndromes in *Caiophora* (Loasaceae, subfam. Loasoideae). *Ann. Bot.* 117: 937-947.
